# Supplementary material
Source: PubMed Central journal article supplement (PMC5548640)
Supplement: NIHMS877403-supplement-3.pdf [file NIHMS877403-supplement-3.pdf]

**Supplementary Table 1a List of residue positions evaluated in mutagenesis screen**

| Position | Residue | Domain | Variants (/19) | Position | Residue | Domain | Variants (/19) |
|----------|---------|--------|----------------|----------|---------|--------|----------------|
| 130      | K       | REC1   | 19             | 546      | V       | WED-II | 19             |
| 131      | G       | REC1   | 18             | 547      | N       | WED-II | 14             |
| 132      | L       | REC1   | 17             | 548      | K       | WED-II | 19             |
| 133      | F       | REC1   | 19             | 550      | K       | WED-II | 15             |
| 134      | K       | REC1   | 17             | 551      | N       | WED-II | 15             |
| 135      | A       | REC1   | 18             | 552      | N       | WED-II | 16             |
| 162      | F       | REC1   | 19             | 570      | K       | WED-II | 19             |
| 163      | D       | REC1   | 13             | 571      | Q       | WED-II | 19             |
| 164      | K       | REC1   | 14             | 572      | K       | WED-II | 19             |
| 165      | F       | REC1   | 18             | 573      | G       | WED-II | 19             |
| 166      | T       | REC1   | 19             | 595      | Y       | WED-II | 16             |
| 168      | Y       | REC1   | 12             | 596      | D       | WED-II | 19             |
| 169      | F       | REC1   | 17             | 597      | Y       | WED-II | 15             |
| 171      | G       | REC1   | 10             | 599      | P       | PI     | 15             |
| 172      | F       | REC1   | 17             | 600      | D       | PI     | 12             |
| 173      | Y       | REC1   | 18             | 601      | A       | PI     | 17             |
| 174      | E       | REC1   | 15             | 602      | A       | PI     | 16             |
| 175      | N       | REC1   | 17             | 603      | K       | PI     | 16             |
| 176      | R       | REC1   | 19             | 604      | M       | PI     | 18             |
| 177      | K       | REC1   | 19             | 605      | I       | PI     | 16             |
| 536      | Q       | WED-II | 15             | 606      | P       | PI     | 10             |
| 537      | M       | WED-II | 14             | 607      | K       | PI     | 13             |
| 538      | P       | WED-II | 19             | 608      | C       | PI     | 15             |
| 539      | T       | WED-II | 18             | 609      | S       | PI     | 12             |
| 540      | L       | WED-II | 18             | 610      | T       | PI     | 17             |
| 541      | A       | WED-II | 18             | 611      | Q       | PI     | 12             |
| 542      | S       | WED-II | 19             | 612      | L       | PI     | 11             |
| 543      | G       | WED-II | 19             | 613      | K       | PI     | 18             |
| 544      | W       | WED-II | 17             | 614      | A       | PI     | 18             |
| 545      | D       | WED-II | 17             | 615      | V       | PI     | 13             |

**Supplementary Table 1b List of variants depleted at least 15-fold relative to pUC19**

| TATC   |        | TGTC  | TTCC   |       | TCCC   |
|--------|--------|-------|--------|-------|--------|
| K164N  | K548E  | A135F | K130Q  | Q571S | S542R* |
| Y168V  | K548A* | F169Y | K130L  | Q571P |        |
| G171N  | K548V* | F172A | G131D  | Q571A |        |
| G171M  | K548G* | F172I | G131F  | Q571G |        |
| G171S  | K548Y* | K177L | K134C  | Q571C |        |
| G171L  | K548F* | K548T | F169W  | K572P |        |
| E174L  | K548C* | K548M | F169Y  | K572R |        |
| T539R  | K548W* | K548S | G171L  | G573I |        |
| L540F  | N551R* | K548R | G171Y  | G573L |        |
| K548N* | N551Y  | K548H | K177R  | G573E |        |
| K548T* | N552G* | K548Q | Q536R  | Y595L |        |
| K548I* | N552K* | K548A | M537R  | D596N |        |
| K548S* | N552R* | K548V | S542L  | D596S |        |
| K548R* | N552S* | K548G | S542R* | D596A |        |
| K548H* | N552T* | K548Y | K548R  | D596C |        |
| K548Q* | N552Q  | K548C | K550T  | P599G |        |
| K548P  | A601C  | K548W | K550H  | D600M |        |
| K548L  | A614R  |       | K550P  | A602K |        |
|        |        |       | K550R  | A602Y |        |
|        |        |       | N551I  | K607H |        |
|        |        |       | N551S  | S609G |        |
|        |        |       | N551R  | A614Q |        |
|        |        |       | Q571T  | A614L |        |

\* Evaluated in HEK293T cells in this study.

Supplementary Table 2 BLISS data

| Target        | WT AsCpf1 |      |           | S542R/K607R |      |           | S542R/K548V/N552R |      |           | PAM  | Sequence                  |
|---------------|-----------|------|-----------|-------------|------|-----------|-------------------|------|-----------|------|---------------------------|
|               | BLISS     | PAM  | % Indel   | BLISS       | PAM  | % Indel   | BLISS             | PAM  | % Indel   |      |                           |
| <i>VEGFA</i>  | 0.833     | 0.88 | 58 (1.5)  | 0.988       | 0.42 | 54 (1.3)  | 0.895             | 0.89 | 59 (1.6)  | TTTG | CTAGGAATATTGAAGGGGGCAGG   |
| OT1           | ND        | 0.00 | <0.1      | 0.025       | 0.00 | <0.1      | ND                | 0.24 | <0.1      | CATA | GCAGGTATTTGAAGGGGGCAGG    |
| <i>GRIN2B</i> | 0.590     | 0.88 | 49 (2.7)  | 0.664       | 0.42 | 51 (1.8)  | 0.969             | 0.89 | 60 (2.1)  | TTTG | GTGCTCAATGAAAGGAGATAAGG   |
| <i>DNMT1</i>  | 0.467     | 0.88 | 33 (5.9)  | 0.042       | 0.42 | 12 (2.4)  | 0.809             | 0.89 | 48 (12)   | TTTG | AAGAAATATTACAACATATAAAA   |
| OT1           | ND        | 0.00 | <0.1      | ND          | 0.00 | <0.1      | 0.030             | 0.24 | <0.1      | CATA | AACAAATACACTAATATATAAAA   |
| OT2           | ND        | 0.00 | <0.1      | 0.030       | 0.00 | <0.1      | ND                | 0.00 | <0.1      | AGAG | AAGCAGTATCACAAATATTTAAA   |
| OT3           | ND        | 0.00 | <0.1      | 0.025       | 0.00 | <0.1      | ND                | 0.00 | <0.1      | TAAA | GAGAAATATTTTCATCATGATAAAA |
| OT4           | 0.022     | 0.00 | <0.1      | ND          | 0.02 | <0.1      | ND                | 0.10 | <0.1      | AACA | AAGAAATATTAGAAAATAATTTAAA |
| <i>EMX1</i>   | 0.738     | 0.88 | 44 (0.8)  | 0.263       | 0.42 | 22 (0.6)  | 0.549             | 0.89 | 41 (2.4)  | TTTG | TCCTCCGGTTCTGGAACCCACACC  |
| OT1           | 0.187     | 0.14 | 4.8 (0.2) | 2.958       | 0.95 | 32 (1.5)  | 0.704             | 0.34 | 11 (1.3)  | TTCA | TCCTCCGGTTCTGGAACCAGATT   |
| OT2           | 0.048     | 0.14 | 3.7 (0.2) | 1.173       | 0.95 | 40 (1.2)  | 0.189             | 0.34 | 13 (0.9)  | TTCA | TCCTCCGGTTCTGGAACCAGATC   |
| OT3           | ND        | 0.14 | 1.5 (0.2) | 0.794       | 0.95 | 33 (1.3)  | 0.026             | 0.34 | 6.0 (0.5) | TTCA | TCCTCCGGTTCTGAAACCCACACT  |
| OT4           | ND        | 0.14 | 0.4 (0.1) | 0.419       | 0.95 | 11 (0.9)  | 0.045             | 0.34 | 1.7 (0.1) | TTCA | TCCTCCGGTTCTGAAACCAGATC   |
| OT5           | ND        | 0.14 | 0.1 (0.2) | 0.040       | 0.95 | 1.3 (0.4) | ND                | 0.34 | 0.3 (0.4) | TTCA | TCCTCTGGTTCTGGAACCAGGTC   |
| OT6           | ND        | 0.14 | <0.1      | 0.036       | 0.95 | 2.8 (0.1) | ND                | 0.34 | 0.3 (0.0) | TTCA | TCCTCCGGTTCTGGAACCAGATC   |

BLISS data represent unique DSB ends per  $10^5$  reads (ND: not detected). PAM values are normalized cleavage rates from the *in vitro* PAM identification assay shown in **Figure 2d**. Indel values represent mean (std. dev.) of  $n = 4$  replicates.

**Supplementary Table 3 List of selected Cpf1 orthologs and their predicted PAM-altering mutations**

| #  | Accession No. | Organism                                                        | Name          | "542" | "548" | "552" | "607" |
|----|---------------|-----------------------------------------------------------------|---------------|-------|-------|-------|-------|
| 1  | WP_013282991  | <i>Butyrivibrio proteoclasticus</i>                             | BpCpf1        | R527  | E535  | N540  | K590  |
| 2  | WP_044910712  | <i>Lachnospiraceae bacterium MC2017</i>                         | Lb3Cpf1       | N520  | E528  | K533  | K582  |
| 3  | KKR91555      | <i>Candidatus Falkowbacteria bacterium GW2011_GWA2_41_14</i>    |               | E633  | K639  | Y643  | G705  |
| 4  | KKP36646      | <i>Candidatus Peregrinibacteria bacterium GW2011_GWA2_33_10</i> | PeCpf1        | G623  | K629  | N633  | K703  |
| 5  | KKQ36153      | <i>candidate division WS6 bacterium GW2011_GWA2_37_6</i>        |               | G568  | Q574  | K578  | R619  |
| 6  | EKE28449      | <i>uncultured bacterium (gcode 4)</i>                           |               | T552  | K558  | R562  | R615  |
| 7  | KKQ38174      | <i>Candidatus Roizmanbacteria bacterium GW2011_GWA2_37_7</i>    |               | N592  | K598  | N602  | K660  |
| 8  | KKT48220      | <i>Parcubacteria group bacterium GW2011_GWC2_44_17</i>          | PbCpf1        | K624  | K630  | F634  | R689  |
| 9  | WP_005398606  | <i>Helcococcus kunzii</i>                                       |               | D554  | K560  | N564  | N614  |
| 10 | WP_028830240  | <i>Proteocatella sphenisci</i>                                  |               | K483  | K489  | N493  | K551  |
| 11 | WP_015504779  | <i>Candidatus Methanomethylophilus alvus</i>                    |               | D515  | K521  | N525  | K577  |
| 12 | CUP14506      | <i>Lachnospira pectinoschiza</i>                                |               | S548  | K554  | N558  | K614  |
| 13 | CUM80100      | <i>Eubacterium rectale</i>                                      |               | D529  | K535  | N539  | K594  |
| 14 | WP_012739647  | <i>Eubacterium eligens</i>                                      | EeCpf1        | N535  | K541  | N545  | K601  |
| 15 | AIZ56868      | <i>Candidatus Methanoplasma termitum</i>                        | CMtCpf1       | N528  | K534  | Y538  | R591  |
| 16 | WP_037975888  | <i>Synergistes jonesii</i>                                      |               | K539  | K545  | N549  | K602  |
| 17 | WP_021736722  | <i>Acidaminococcus sp. BV3L6</i>                                | <b>AsCpf1</b> | S542  | K548  | N552  | K607  |
| 18 | WP_031492824  | <i>Succinivibrio dextrinosolvens</i>                            |               | E564  | K570  | C574  | K629  |
| 19 | WP_018359861  | <i>Porphyromonas macacae</i>                                    | PmCpf1        | S559  | K565  | N569  | K623  |
| 20 | WP_050786240  | <i>Prevotella disiens</i>                                       |               | T588  | N600  | Y604  | K674  |
| 21 | WP_027407524  | <i>Anaerovibrio sp. RM50</i>                                    |               | A525  | N531  | N535  | K594  |
| 22 | KDN25524      | <i>Moraxella bovoculi 237</i>                                   | MbCpf1        | N576  | K582  | N586  | K637  |
| 23 | AJI61006      | <i>Francisella tularensis subsp. novicida U112</i>              | FnCpf1        | N607  | K613  | N617  | K671  |
| 24 | KUJ74576      | <i>Thiomicrospira sp. XS5</i>                                   |               | S575  | K581  | N585  | K658  |
| 25 | WP_051666128  | <i>Lachnospiraceae bacterium ND2006 (*)</i>                     | LbCpf1        | G550  | K556  | Y560  | K613  |
| 26 | WP_027109509  | <i>Lachnospiraceae bacterium NC2008</i>                         |               | G511  | K517  | C521  | K574  |
| 27 | WP_027216152  | <i>Butyrivibrio fibrisolvens</i>                                |               | D510  | N516  | Y520  | N573  |
| 28 | WP_028248456  | <i>Pseudobutyrvibrio ruminis</i>                                |               | N511  | K517  | N521  | K574  |
| 29 | WP_049895985  | <i>Oribacterium sp. NK2B42</i>                                  |               | D528  | K534  | N538  | K591  |
| 30 | WP_035798880  | <i>Butyrivibrio sp. NC3005</i>                                  |               | N512  | K518  | N522  | K575  |
| 31 | WP_044919442  | <i>Lachnospiraceae bacterium MA2020</i>                         | Lb2Cpf1       | N512  | K518  | N522  | K575  |
| 32 | WP_044910713  | <i>Lachnospiraceae bacterium MC2017</i>                         |               | C537  | K543  | Y547  | K599  |
| 33 | WP_020988726  | <i>Leptospira inadai</i>                                        | LiCpf1        | K580  | R586  | N590  | R644  |
| 34 | WP_016301126  | <i>Lachnospiraceae bacterium COE1</i>                           |               | D545  | K551  | N555  | R608  |
| 35 | KIE18657      | <i>Smithella sp. SC_K08D17</i>                                  | SsCpf1        | G561  | K567  | N571  | K625  |
| 36 | WP_014085038  | <i>Flavobacterium branchiophilum</i>                            |               | N588  | K594  | Y598  | K649  |
| 37 | WP_045971446  | <i>Flavobacterium sp. 316</i>                                   |               | N586  | K592  | Y596  | K647  |
| 38 | KXB38146      | <i>Bacteroidales bacterium KA00251</i>                          |               | A550  | K556  | N560  | K613  |
| 39 | WP_036890108  | <i>Porphyromonas crevioricanis</i>                              | PcCpf1        | S575  | K581  | N585  | K641  |
| 40 | WP_044110123  | <i>Prevotella brevis</i>                                        |               | D541  | K547  | N551  | K603  |
| 41 | WP_009217842  | <i>Bacteroidetes oral taxon 274</i>                             |               | D564  | K570  | N574  | K628  |
| 42 | WP_006283774  | <i>Prevotella bryantii</i>                                      |               | G566  | K572  | N576  | K629  |
| 43 | WP_024988992  | <i>Prevotella albensis</i>                                      |               | G561  | K567  | C571  | K624  |

(\*) The version of LbCpf1 we used in this study has the first 18 residues deleted relative to the NCBI record for accession number WP\_051666128, consistent with previous work (Zetsche *et al.* 2015; Yamano *et al.* 2016). The numbering in figures and text is based on the truncated sequence (G532/K538/Y542/K595).

**Supplementary Table 4a Selected list of plasmids used in study**

| <b>Construct</b>                      | <b>Experiments Used</b> | <b>Figures</b>                    | <b>Addgene #</b> |
|---------------------------------------|-------------------------|-----------------------------------|------------------|
| T7-AsCpf1(library)-T7-crRNA           | Bacterial               | 1C-D                              |                  |
| CMV-AsCpf1(WT)-NLS-3xHA               | Indel; lysate           | 2A-D, 3B-C, S1, S4, S8            | 69982            |
| CMV-NLS-AsCpf1(WT)-NLS-3xHA           | Indel                   | 2E, S5, S10                       |                  |
| CMV-AsCpf1(RR)-NLS-3xHA               | Indel; lysate           | 2A-D, 3B-C, S4                    |                  |
| CMV-NLS-AsCpf1(RR)-NLS-3xHA           | Indel                   | 2E, 3D, S5, S10                   | 89351            |
| CMV-AsCpf1(RVR)-NLS-3xHA              | Indel; lysate           | 2A-D, 3B-C, S1                    |                  |
| CMV-NLS-AsCpf1(RVR)-NLS-3xHA          | Indel                   | 2E, 3D, S5, S10                   | 89353            |
| CMV-NLS-LbCpf1(WT)-NLS-3xHA           | Indel                   | S10, S11                          |                  |
| CMV-NLS-LbCpf1(RR)-NLS-3xHA           | Indel                   | S10, S11                          | 89355            |
| CMV-NLS-LbCpf1(RVR)-NLS-3xHA          | Indel                   | S10, S11                          |                  |
| U6-crRNA-CBh-NLS-AsCpf1(WT)-NLS-3xHA  | BLISS                   | 3A                                |                  |
| U6-crRNA-CBh-NLS-AsCpf1(RR)-NLS-3xHA  | BLISS; indel (Neuro2a)  | 3A, S6                            | 89352            |
| U6-crRNA-CBh-NLS-AsCpf1(RVR)-NLS-3xHA | BLISS                   | 3A                                | 89354            |
| U6-crRNA(As)-CMV-mCherry              | Indel                   | 2A, 2E, 3B-D, S1, S4, S5, S8, S10 |                  |
| U6-crRNA(Lb)-CMV-mCherry              | Indel                   | S10, S11                          |                  |

**Supplementary Table 4b List of guide sequences used in study**

| Figure |    |          | Gene            | PAM         | Guide Sequence (5' to 3')      |
|--------|----|----------|-----------------|-------------|--------------------------------|
| 1C     | 1D |          | [Plasmid]       | Varies      | CCGATGGTCCATGTCTGTTACTCGCCTGTC |
| 2A     |    |          | <i>DNMT1</i>    | TCCC site 1 | GTCACCCCTGTTTCTGGCACCAG        |
| 2A     |    |          | <i>DNMT1</i>    | TTCC site 1 | TGGTGCCAGAAACAGGGGTGACG        |
| 2A     |    |          | <i>VEGFA</i>    | TTCC site 2 | AAAGCCCATTCCCTCTTTAGCCA        |
| 2A     | S1 |          | <i>VEGFA</i>    | TATC site 1 | AAATTCCAGCACCGAGCGCCCTG        |
| 2A     |    |          | <i>DNMT1</i>    | TATA site 1 | GGAGAGATTTATTTGAAGAATA         |
| 2B     | 2C | 2D       | [Plasmid]       | NNNN        | GAGAAGTCATTTAATAAGCCACT        |
| 2E     |    | S5A S10B | <i>TSPYL6</i>   | TTTG        | ATGGCCGCTTGGAGCCAATCGTG        |
| 2E     |    | S5A S10B | <i>PRMT1</i>    | TTTG        | ACGATCTTCACGCATAATCAGA         |
| 2E     |    | S5A S10B | <i>WNT8A</i>    | TTTC        | CCCAAATTCCACATTGTCGCTGC        |
| 2E     |    | S5A S10B | <i>FANCF</i>    | TTTG        | CACTATGACCTTCAGAAAGGCAT        |
| 2E     |    | S5A S10B | <i>PRCC</i>     | TTTG        | TCACCTGCAGGGCAGCACTCTTG        |
| 2E     |    | S5A S10B | <i>THAP10</i>   | TTTG        | ACGTCTCTCGTTATCCAGAAG          |
| 2E     |    | S5A S10B | <i>FASTKD1</i>  | TTTC        | TTCGAAATGTTAGATATCGTTAT        |
| 2E     |    | S5A S10B | <i>AGO1</i>     | TTTG        | ATGCAGGCATCACGAATGGCCAG        |
| 2E     |    | S5A S10B | <i>RBM11</i>    | TTTG        | CTGAATGGAATTCGTTTATATGG        |
| 2E     |    | S5A S10B | <i>PROM2</i>    | TTTC        | AGGCTCTGCAACTCCTGCCGTAG        |
| 2E     |    | S5A S10B | <i>GRN</i>      | TTTA        | CGTGTGACACGAGAAAGGGTACC        |
| 2E     |    | S5A S10B | <i>RUNX1</i>    | TTTC        | ACATTTGCTTCTCTTACCATAG         |
| 2E     |    | S5A S10B | <i>ESAM</i>     | TTTC        | TCCTGGAGACCCTCCAGCCGAG         |
| 2E     |    | S5A S10B | <i>RRAGA</i>    | TTTC        | CAGTTCGGGCTCTCCACGCAA          |
| 2E     |    | S5A S10B | <i>APOB</i>     | TTTC        | AGTGGATATTTCTGTTGCCACAT        |
| 2E     |    | S5A S10B | <i>ERBB2</i>    | TTTG        | TGGAAGGACATCTCCACAAGAA         |
| 2E     |    | S5A S10B | <i>LIPF</i>     | TTTC        | CTCTGCTGTTGCCAGCCACACA         |
| 2E     |    | S5A S10B | <i>FXN</i>      | TTTC        | CCAGTCCAGTCATAACGCTTAGG        |
| 2E     |    | S5A S10B | <i>FAP</i>      | TTTC        | GGTCTGTCTATATGTGACTTCA         |
| 2E     |    | S5A S10B | <i>DNMT2</i>    | TTTC        | CAGAACACTGTATGCTGCCATCA        |
| 2E     |    | S5A S10B | <i>HOTTIP</i>   | TTTC        | CCTGAGAGCTGGGCCGAACGGGG        |
| 2E     |    | S5A S10B | <i>XIST</i>     | TTTA        | CCCTTGGCATTGCTGATCTTCCAG       |
| 2E     |    | S5A S10B | <i>HIST1H4C</i> | TTTC        | CGGTCTTATCTATGAGGAGACTC        |
| 2E     | 3D | S5B S10B | <i>TSPYL6</i>   | TCCA        | AGCGGCCATCAAACATATCTGCC        |
| 2E     | 3D | S5B S10B | <i>PRMT1</i>    | TTCA        | CCGCATAATCAGAGATACTGGAA        |
|        |    | S5B      | <i>WNT8A</i>    | CCCC        | AAATTCACATTGTCGCTGCAGC         |
| 2E     | 3D | S5B S10B | <i>FANCF</i>    | TCCA        | ACCCAAATGCCTTTCTGAAGGTC        |
| 2E     | 3D | S5B S10B | <i>PRCC</i>     | TTCC        | TGCGTGATCTGCTTTGTCACTG         |
| 2E     | 3D | S5B S10B | <i>THAP10</i>   | TCCC        | AGCGCCTGAGGCTGGTGGCAGGC        |
| 2E     | 3D | S5B S10B | <i>FASTKD1</i>  | TTCG        | AAATGTTAGATATCGTTATCAAC        |
| 2E     | 3D | S5B S10B | <i>AGO1</i>     | TCCA        | GTTTGATGCAGGCATCACGAATG        |
| 2E     | 3D | S5B S10B | <i>RBM11</i>    | TTCG        | TTTATATGGAAGACCAATTAACG        |
| 2E     | 3D | S5B S10B | <i>PROM2</i>    | TTCA        | GGCTCTGCAACTCCTGCCGTAGC        |
|        |    | S5B      | <i>GRN</i>      | CCCC        | GCGGGACAGCAGTGTATGTGGTC        |
| 2E     | 3D | S5B S10B | <i>RUNX1</i>    | TCCC        | TATGGTAAAGAGAAGCAAATGTG        |
| 2E     | 3D | S5B S10B | <i>ESAM</i>     | TTCC        | GGGAGGGCATGGAGTAGACCAAG        |
| 2E     | 3D | S5B S10B | <i>RRAGA</i>    | TTCC        | AGTTCGGGCTCTCCACGCAAAA         |
|        |    | S5B      | <i>APOB</i>     | CCCC        | AGGTCTTTTCAGTGGATATTTTC        |
| 2E     | 3D | S5B S10B | <i>ERBB2</i>    | TTCC        | ACAAGAACAACAGCTGGCTCTC         |
| 2E     | 3D | S5B S10B | <i>LIPF</i>     | TTCC        | TCTGCTGTTGCCAGCCACACAT         |

Supplementary Table 4b (continued)

|     |    |     |      |                 |      |                          |
|-----|----|-----|------|-----------------|------|--------------------------|
| 2E  | 3D | S5B | S10B | <i>FXN</i>      | TCCC | AGTCCAGTCATAACGCTTAGGTC  |
| 2E  | 3D | S5B | S10B | <i>FAP</i>      | TCCC | TGAAGTCACATATAGACAGGACC  |
| 2E  | 3D | S5B | S10B | <i>DNMT2</i>    | TCCA | GAACACTGTATGCTGCCATCAAA  |
| 2E  | 3D | S5B | S10B | <i>HOTTIP</i>   | TTCG | GCCCAGCTCTCAGGAAACGAAG   |
| 2E  | 3D | S5B | S10B | <i>XIST</i>     | TCCG | TTTACCCTTGGCATTGCTGATCT  |
| 2E  | 3D | S5B | S10B | <i>HIST1H4C</i> | TTCC | GGTCTTATCTATGAGGAGACTCG  |
| 2E  | 3D | S5C | S10B | <i>TSPYL6</i>   | TATC | TGCCATTACCTCTGTCGCCTTGC  |
| 2E  | 3D | S5C | S10B | <i>PRMT1</i>    | TATC | TCTGATTATGCGGTGAAGATCGT  |
| 2E  | 3D | S5C | S10B | <i>WNT8A</i>    | TATA | TAGGAGGCCATGGCTGGATCTGG  |
| 2E  | 3D | S5C | S10B | <i>FANCF</i>    | TATC | TGGGTCTGCTAACAGACTGGGGT  |
| 2E  | 3D | S5C | S10B | <i>PRCC</i>     | TATC | AAGGCTGCTGCCAAGAGTGTCTGC |
| 2E  | 3D | S5C | S10B | <i>THAP10</i>   | TATC | CAGAAGAACTGCGCTTCTCCCA   |
| 2E  | 3D | S5C | S10B | <i>FASTKD1</i>  | TATC | TAACATTTGGAAGAACTTTGCT   |
| 2E  | 3D | S5C | S10B | <i>AGO1</i>     | TATG | AGCTACTGGCCATTCTGTATGCC  |
| 2E  | 3D | S5C | S10B | <i>RBM11</i>    | TATG | CCATAGCTTTGCTGAATGGAATT  |
| 2E  | 3D | S5C | S10B | <i>PROM2</i>    | TATA | CCAACAAGCTACGGCAGGAGTTG  |
| 2E  | 3D | S5C | S10B | <i>GRN</i>      | TATG | TGGTCCTCACAGCACACAGCCTA  |
| 2E  | 3D | S5C | S10B | <i>RUNX1</i>    | TATG | GTAAAGAGAAGCAAATGTGAAAC  |
| 2E  | 3D | S5C | S10B | <i>ESAM</i>     | TATC | CTTGGTCTACTCCATGCCCTCCC  |
| 2E  | 3D | S5C | S10B | <i>RRAGA</i>    | TATC | TTCCGTAACGTGGAAGTTTTGAT  |
| 2E  | 3D | S5C | S10B | <i>APOB</i>     | TATC | CACTGAAAGAGACCTGGGGCAGT  |
| 2E  | 3D | S5C | S10B | <i>ERBB2</i>    | TATC | AGTGTGAGAGCCAGCTGGTTGTT  |
| 2E  | 3D | S5C | S10B | <i>LIPF</i>     | TATG | ATGTGTGGCTGGGCAACAGCAGA  |
| 2E  | 3D | S5C | S10B | <i>FXN</i>      | TATG | ACTGGACTGGGAAAACTGGGTG   |
| 2E  | 3D | S5C | S10B | <i>FAP</i>      | TATA | TGTGACTTCAGGGAAGACTGGCA  |
| 2E  | 3D | S5C | S10B | <i>DNMT2</i>    | TATG | CTGCCATCAAAGCTAATATTTGG  |
| 2E  | 3D | S5C | S10B | <i>HOTTIP</i>   | TATC | AAAAGTTCTTACTGAGCGCTTCG  |
| 2E  | 3D | S5C | S10B | <i>XIST</i>     | TATA | CTGGGATATTCCGTTTACCCTTG  |
| 2E  | 3D | S5C | S10B | <i>HIST1H4C</i> | TATC | TATGAGGAGACTCGAGGTGTGCT  |
| 3A  |    |     |      | <i>VEGFA</i>    | TTTG | CTAGGAATATTGAAGGGGGCAGG  |
| 3A  |    |     |      | <i>GRIN2B</i>   | TTTG | GTGCTCAATGAAAGGAGATAAAG  |
| 3A  |    |     |      | <i>DNMT1</i>    | TTTG | AAGAAATATTACAACATATAAAA  |
| 3A  | 3C | S8  |      | <i>EMX1</i>     | TTTG | TCCTCCGGTTCTGGAACACACC   |
| 3B  |    |     |      | <i>RPL32P3</i>  | TTTG | GGGTGATCAGACCCAACAGCAGG  |
| S4A |    |     |      | <i>EMX1</i>     | TTTG | GGGAGGCCTGGAGTCATGGCCCC  |
| S4A |    |     |      | <i>EMX1</i>     | TTTG | TGGTTGCCACCCTAGTCATTGG   |
| S4A |    |     |      | <i>DNMT1</i>    | TTTC | CCTTCAGCTAAAATAAAGGAGGA  |
| S4A |    |     |      | <i>DNMT1</i>    | TTTG | AGGAGTGTTCACTCCGTGAAC    |
| S4A |    |     |      | <i>CFTR</i>     | TTTA | ATGGTGCCAGGCATAATCCAGGA  |
| S4A |    |     |      | <i>VEGFA</i>    | TTTA | GCCAGAGCCGGGTGTGCAGACG   |
| S4A |    |     |      | <i>DNMT1</i>    | TTTC | CTGATGGTCCATGTCTGTTACTC  |
| S4A |    |     |      | <i>VEGFA</i>    | TTTC | CAAAGCCCATTCCCTCTTAGCC   |
| S4A |    |     |      | <i>DNMT1</i>    | TTTA | GCTGAAGGGAAAATAAAGGAAAA  |
| S4A |    |     |      | <i>CFTR</i>     | TCTC | AGTTTTCTGGATTATGCCTGGC   |
| S4A |    |     |      | <i>EMX1</i>     | TCTG | GCCACTCCCTGGCCAGGCTTTGG  |
| S4A |    |     |      | <i>CFTR</i>     | TCTA | TATTCATCATAGGAAACACCAA   |
| S4A |    |     |      | <i>VEGFA</i>    | TCTC | TGTACATGAAGCAACTCCAGTCC  |
| S4A |    |     |      | <i>DNMT1</i>    | TCTG | CCCTCCCGTCACCCCTGTTTCTG  |
| S4A |    |     |      | <i>VEGFA</i>    | TCTA | TTGGAATCCTGGAGTGACCCTG   |

Supplementary Table 4b (continued)

|     |     |  |              |      |                          |
|-----|-----|--|--------------|------|--------------------------|
| S4A |     |  | <i>DNMT1</i> | TCTC | CGTGAACGTTCCCTTAGCACTCT  |
| S4A |     |  | <i>VEGFA</i> | TCTG | GCTAAAGAGGGAATGGGCTTTGG  |
| S4A |     |  | <i>EMX1</i>  | TTCT | TCTTCTGCTCGGACTCAGGCCCT  |
| S4A |     |  | <i>DNMT1</i> | TTCT | GCCCTCCCGTCACCCCTGTTTCT  |
| S4A |     |  | <i>VEGFA</i> | TTCT | GACCTCCCAAACAGCTACATATT  |
| S4A |     |  | <i>DNMT1</i> | TCCT | GGTGCCAGAAACAGGGGTGACGG  |
| S4A |     |  | <i>DNMT1</i> | TCCT | GATGGTCCATGTCTGTTACTCGC  |
| S4B | S4A |  | <i>CFTR</i>  | TTCG | GCGATGTTTTTCTGGAGATTTA   |
| S4B | S4A |  | <i>DNMT1</i> | TTCA | GCTAAAATAAAGGAGGAGGAAGC  |
| S4B | S4A |  | <i>DNMT1</i> | TCCC | GTCACCCCTGTTTCTGGCACCAG  |
| S4B | S4A |  | <i>DNMT1</i> | TTCC | TGGTGCCAGAAACAGGGGTGACG  |
| S4B | S4A |  | <i>DNMT1</i> | TTCA | GTCTCCGTGAACGTTCCCTTAGC  |
| S4B | S4A |  | <i>DNMT1</i> | TTCA | CGGAGACTGAACACTCCTCAAAC  |
| S4B | S4A |  | <i>EMX1</i>  | TTCG | TGGCAATGCGCCACCGGTTGATG  |
| S4B | S4A |  | <i>VEGFA</i> | TTCC | CTGTGGTGGCCGAGCGCCCCCTA  |
| S4B | S4A |  | <i>VEGFA</i> | TCCA | GTCCCAAATATGTAGCTGTTTGG  |
| S4B | S4A |  | <i>VEGFA</i> | TCCG | CACGTAACCTCACTTTCTGCTC   |
| S4B | S4A |  | <i>VEGFA</i> | TCCG | CCCCCGAAAACCTGTCCAGAGA   |
| S4B | S4A |  | <i>VEGFA</i> | TCCG | GGGGCGGATGGGTAATTTTCAGG  |
| S4B | S4A |  | <i>VEGFA</i> | TCCC | TCTTTAGCCAGAGCCGGGGTGTG  |
| S4B | S4A |  | <i>VEGFA</i> | TCCA | ATAGATCTGTGTGCCCTCTCCC   |
| S4B | S4A |  | <i>VEGFA</i> | TTCC | AAAGCCCATTCCTCTTTAGCCA   |
| S4B | S4A |  | <i>VEGFA</i> | TCCC | CCCACCCCTTTCCAAGCCCAT    |
| S4B |     |  | <i>CFTR</i>  | GTCG | AAAATTTTACACCACAAAATGTT  |
| S4B |     |  | <i>CFTR</i>  | ACCA | AAGATGATATTTCTTTAATGGT   |
| S4B |     |  | <i>CFTR</i>  | ACCA | TTAAAGAAAATATCATCTTTGGT  |
| S4B |     |  | <i>CFTR</i>  | ATCC | TAAACTCATTAAATGCCCTTCGGC |
| S4B |     |  | <i>CFTR</i>  | ATCC | AGGAAAACAGGAAACAGAATGAA  |
| S4B |     |  | <i>EMX1</i>  | ATCA | CATCAACCGGTGGCGCATTGCCA  |
| S4B |     |  | <i>EMX1</i>  | GTCC | TCCCCATTGGCCTGCTTCGTGGC  |
| S4B |     |  | <i>EMX1</i>  | CCCG | GGCTTCAAGCCCTGTGGGGCCAT  |
| S4B |     |  | <i>EMX1</i>  | ATCG | ATGTACCTCCAATGACTAGGGT   |
| S4B |     |  | <i>EMX1</i>  | ATCG | ATGTCTCCCCATTGGCCTGCTT   |
| S4B |     |  | <i>VEGFA</i> | CCCA | TTCCCTCTTTAGCCAGAGCCGGG  |
| S4B |     |  | <i>VEGFA</i> | CTCG | GCCACCACAGGGAAGCTGGGTGA  |
| S4B |     |  | <i>VEGFA</i> | GTCC | CAAATATGTAGCTGTTTGGGAGG  |
| S4B |     |  | <i>VEGFA</i> | GCCG | AGCGCCCCCTAGTGAAGCCGTC   |
| S4B |     |  | <i>VEGFA</i> | GCCC | ATTCCCTCTTTAGCCAGAGCCGG  |
| S4B |     |  | <i>VEGFA</i> | CCCG | GCTCTGGCTAAAGAGGGAATGGG  |
| S4B |     |  | <i>VEGFA</i> | GCCA | GAGCCGGGGTGTGCAGACGGCAG  |
| S4B |     |  | <i>VEGFA</i> | CTCG | CTCCATTACCCAGCTTCCCTGT   |
| S4B |     |  | <i>VEGFA</i> | GCCC | TGGGCTCTGTACATGAAGCAA    |
| S4B |     |  | <i>VEGFA</i> | CTCC | AGTCCCAAATATGTAGCTGTTTG  |
| S4B |     |  | <i>VEGFA</i> | GTCA | GAAATAGGGGGTCCAGGAGCAAA  |
| S4B |     |  | <i>VEGFA</i> | ACCC | CGGCTCTGGCTAAAGAGGGAATG  |
| S4B |     |  | <i>VEGFA</i> | ACCA | CAGGGAAGCTGGGTGAATGGAGC  |
| S4B |     |  | <i>VEGFA</i> | CCCA | GCTTCCCTGTGGTGGCCGAGCGC  |
| S4B |     |  | <i>VEGFA</i> | GCCG | TCTGCACACCCCGGCTCTGGCTA  |
| S4B |     |  | <i>VEGFA</i> | GCCC | CCTAGTGACTGCCGTGTGCACAC  |



Supplementary Table 4b (continued)

|     |  |                      |      |                         |
|-----|--|----------------------|------|-------------------------|
| S4B |  | <i>VEGFA</i>         | GCCA | CCACAGGGAAGCTGGGTGAATGG |
| S4B |  | <i>VEGFA</i>         | GTCA | CTAGGGGGCGCTCGGCCACCACA |
| S4B |  | <i>VEGFA</i>         | GTCC | TCACTCTCGAAGACGCTGCTCGC |
| S4B |  | <i>VEGFA</i>         | GCCG | GGGTGTGCAGACGGCAGTCACTA |
| S4B |  | <i>VEGFA</i>         | CCCG | CTCCAACGCCCTCAACCCACAC  |
| S4B |  | <i>VEGFA</i>         | CTCG | AAGACGCTGCTCGCTCCATTAC  |
| S4B |  | <i>VEGFA</i>         | CTCC | TGGACCCCTATTCTGACCTCC   |
| S4B |  | <i>VEGFA</i>         | ATCC | TGGAGTGACCCCTGGCCTTCTCC |
| S4B |  | <i>VEGFA</i>         | ACCC | CCTTTCAAAGCCCATTCCCTCT  |
| S4B |  | <i>VEGFA</i>         | CCCC | CCACCCCTTTCAAAGCCCATT   |
| S6  |  | <i>PCSK9</i> (mouse) | TCCC | GTCCCAGGAGGATGGCCTGGCTG |
| S6  |  | <i>PCSK9</i> (mouse) | TCCC | AGGAGGATGGCCTGGCTGATGAG |
| S6  |  | <i>PCSK9</i> (mouse) | TTCA | ATCTGTAGCCTCTGGGTCTCCTC |
| S6  |  | <i>PCSK9</i> (mouse) | TCCC | TGGCTTCTTGGTGAAGATGAGCA |
| S6  |  | <i>PCSK9</i> (mouse) | TTCC | TCAATGTACTCCACATGGGGCAA |
| S6  |  | <i>PCSK9</i> (mouse) | TCCA | TGGGATGCTCTGGGCGAAGACAA |
| S6  |  | <i>PCSK9</i> (mouse) | TTCC | TCTGTCTGGTGCCATGCTGGGAT |
| S6  |  | <i>PCSK9</i> (mouse) | TCCC | GATGGGCACCCTGGATGCTGGTA |
| S6  |  | <i>PCSK9</i> (mouse) | TCCC | GGCCGCTGACCACACCTGCCAGG |
